# Supplementary material for: The Impact of Health and Social Services on the Quality of Life in Families of Adults with Autism Spectrum Disorder (ASD): A Focus Group Study
Source: MDPI journal article supplement (doi:10.3390/brainsci12020177), 2022-01-28
Supplement: s1 [file s1]

**Supplementary item 1 – Table S1**

**Table S1.** Characteristics of the subjects included in the LLIP project.

| subject | sex | Diagnosis | support needed | kind of family    | informant | sibling (B/S) | sibling (n) | sibling (age) | parent (age) | parent (employment mother) | parent (employment father) | family income perception vs average country income | Family income Self-perception | % family income for special support |
|---------|-----|-----------|----------------|-------------------|-----------|---------------|-------------|---------------|--------------|----------------------------|----------------------------|----------------------------------------------------|-------------------------------|-------------------------------------|
| 2       | F   | ASD       | Level 3        | two-parent family | Mother    | S             | 1           | -             | -            | Employed full-time         | Self-employed full-time    | Above average                                      | Well off                      | None                                |
| 3       | M   | ASD       | Level 3        | two-parent family | Mother    | S             | 1           | 22            | 59           | Self-employed full-time    | Self-employed full-time    | Average                                            | Doing okay                    | 26% to 50%                          |
| 4       | F   | ASD       | Level 3        | two-parent family | Father    | B             | 1           |               |              |                            |                            |                                                    |                               |                                     |
| 5       | M   | ASD       | Level 3        | two-parent family | Father    | B             | 1           | 24            | 58           | Self-employed full-time    | Self-employed full-time    | Above average                                      | Doing okay                    | 26% to 50%                          |
| 6       | M   | ASD       | Level 3        | one-parent family | Mother    | B             | 2           | 20, 25        | 48           | Employed part-time         | -                          | Well below average                                 | Struggling                    | None                                |
| 8       | M   | ASD       | Level 3        | two-parent family | Father    | B             | 1           | 23            | 56           | Employed full-time         | Self-employed full-time    | Above average                                      | Managing well with some extra | 26% to 50%                          |
| 10      | M   | ASD       | Level 3        | two-parent family | Mother    | S             | 1           | 26            | 60           | Employed part-time         | /                          | Well above average                                 | Well off                      | 26% to 50%                          |
| 11      | M   | ASD       | Level 3        | two-parent family | Father    | S             | 1           | 26            | 60           | /                          | Self-employed full-time    | Well above average                                 | Well off                      | 26% to 50%                          |
| 12      | M   | ASD       | Level 3        | two-parent family | Father    | S             | 2           | 28,33         | 49           | /                          | Employed full-time         | Average                                            | Managing well with some extra | None                                |
